# Supplementary material for: The MAPK Erk5 is necessary for proper skeletogenesis involving a Smurf-Smad-Sox9 molecular axis
Source: Oxford University Press journal article supplement (doi:10.1242/dev.164004), 2018-07-09
Supplement: dev164004supp.pdf [file dev164004supp.pdf]

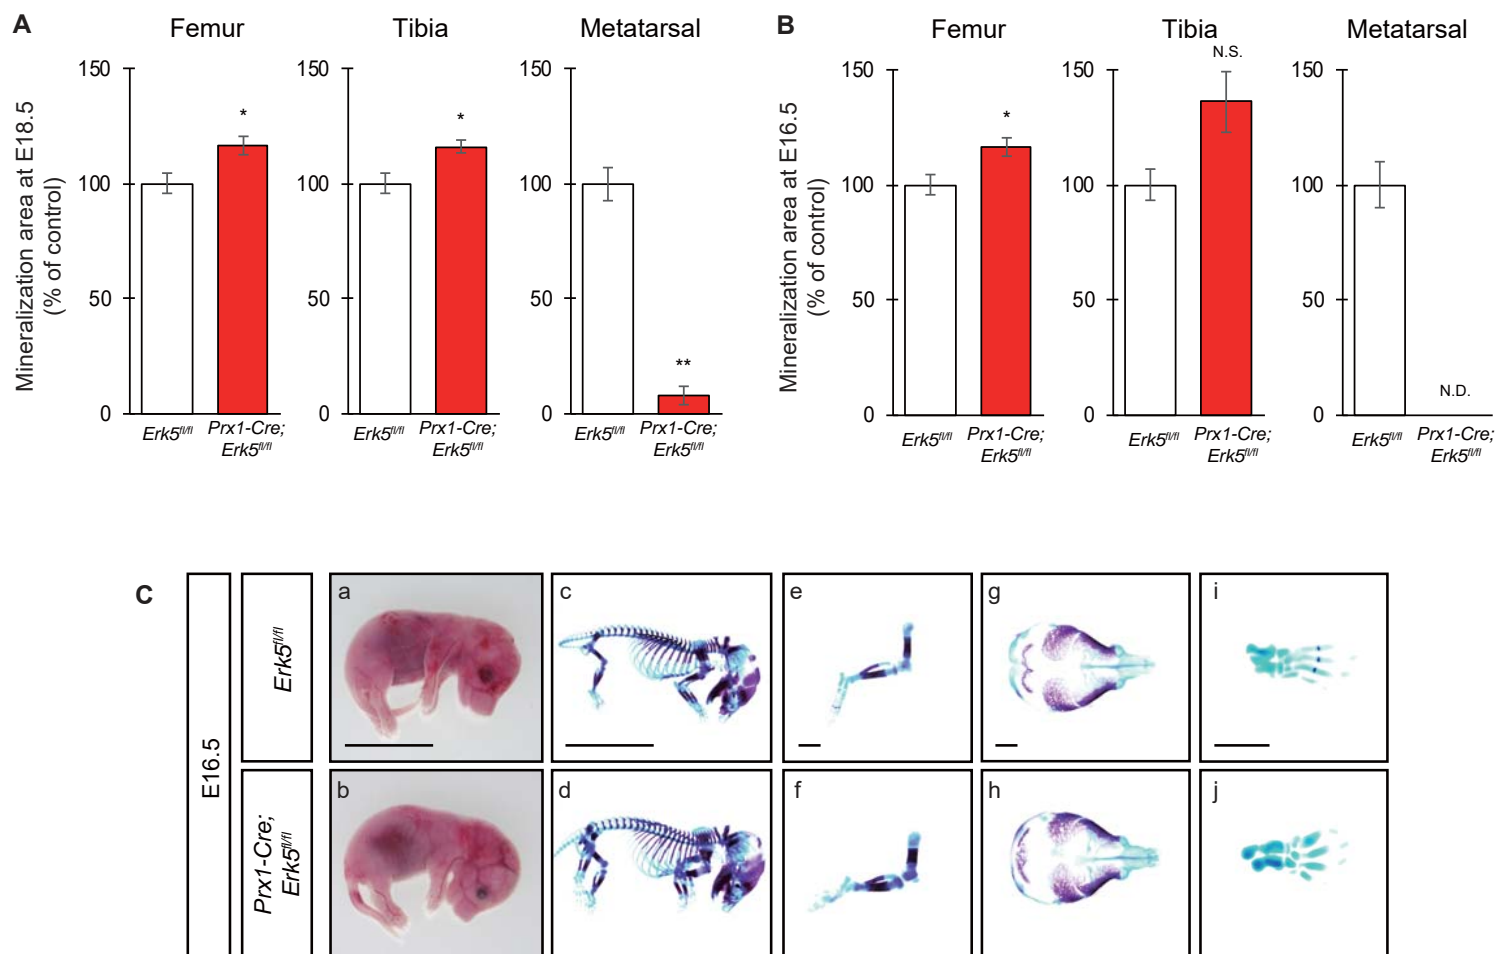

**Figure S1. Phenotypes of *Prx1-Cre;Erk5<sup>fl/fl</sup>* embryos.** Quantitative data of mineralization area of femur, tibia and metatarsal of *Erk5<sup>fl/fl</sup>* and *Prx1-Cre;Erk5<sup>fl/fl</sup>* embryos at (A) E18.5 and (B) E16.5 (n=3). (C) The whole and parts of skeleton of *Erk5<sup>fl/fl</sup>* and *Prx1-Cre;Erk5<sup>fl/fl</sup>* embryos at E16.5. Embryos were double stained with alizarin red and alcian blue. Bar=10 mm (a–d) and Bar=1 mm (e–j). Representative images of skeletal preparations derived from more than 3 embryos from different litters are shown. \*P<0.05, \*\*P<0.01, significantly different from the value obtained in control embryos (A and B). Statistical significance was determined using the two-tailed, unpaired Student's *t*-test (A and B). N.S., not significant. N.D., not detected.

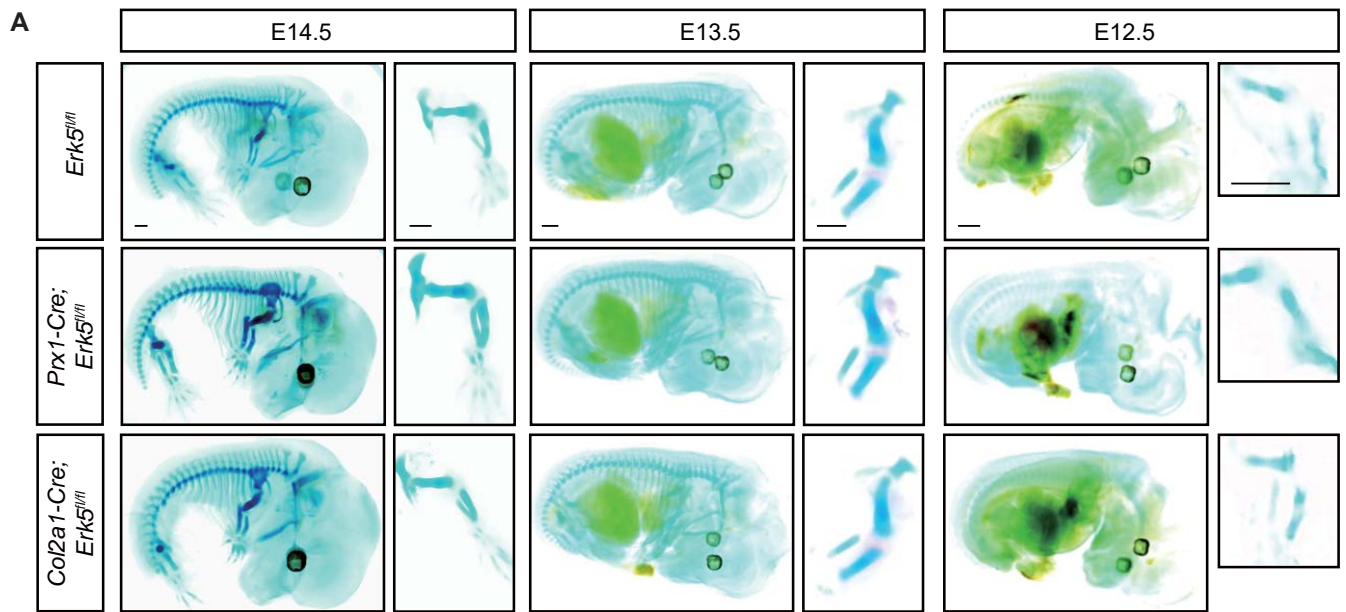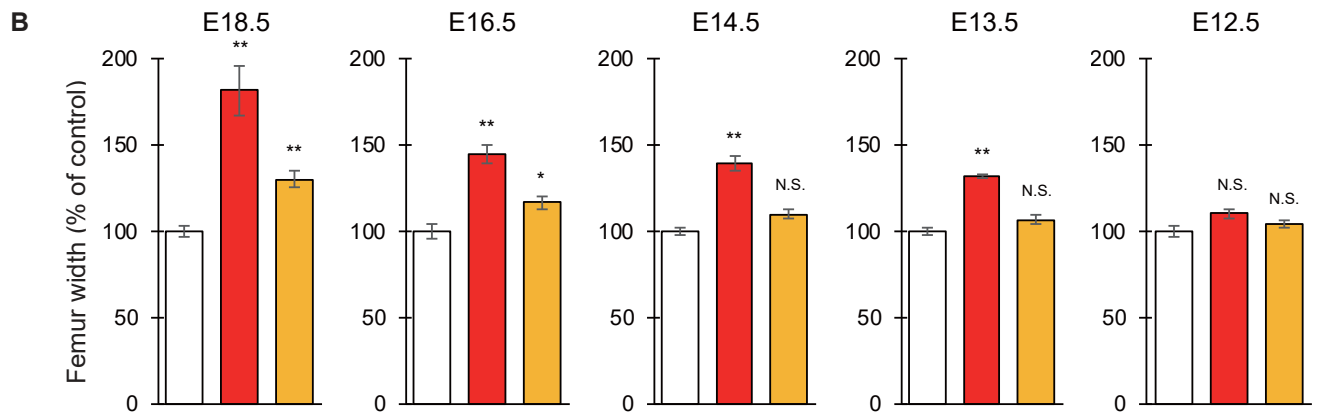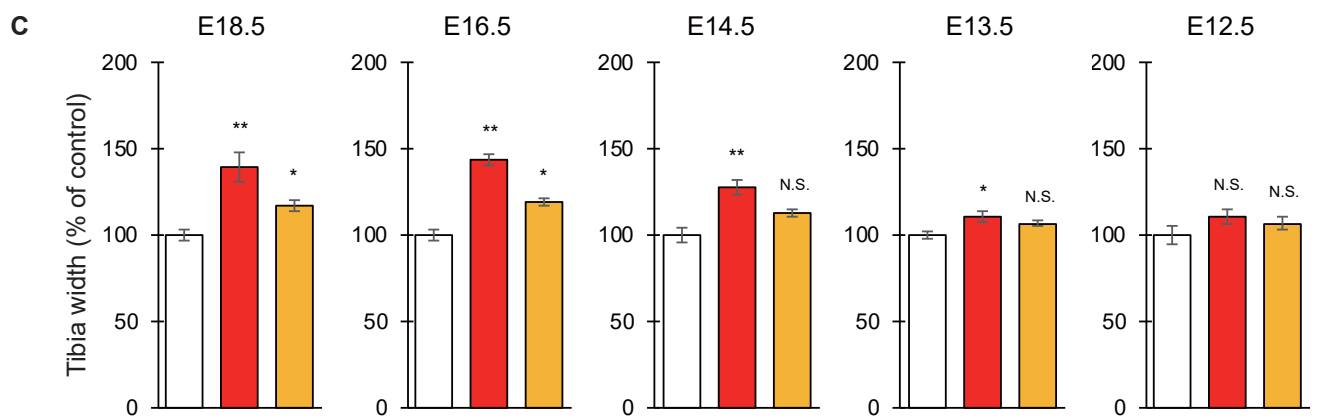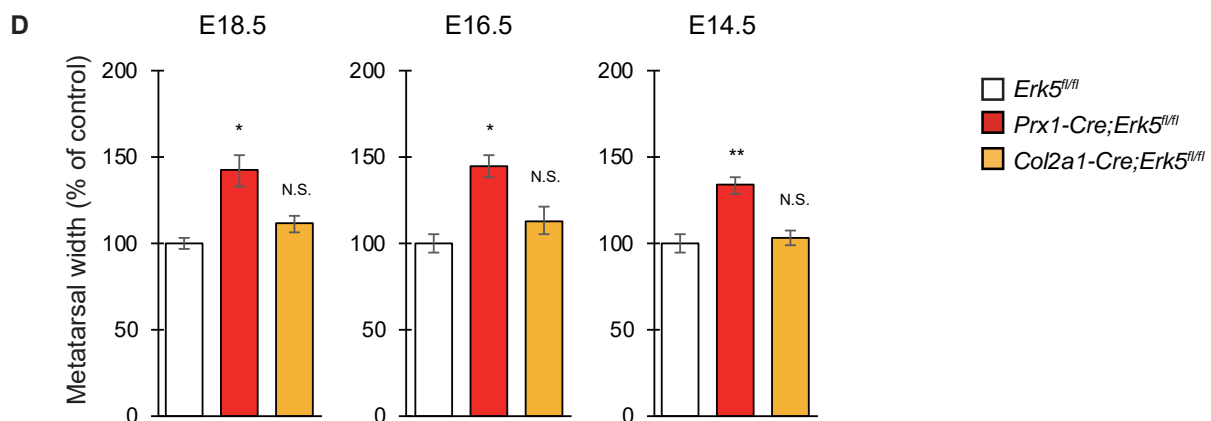

**Figure S2. Phenotypes of *Prx1-Cre;Erk5<sup>fl/fl</sup>* and *Col2a1-Cre;Erk5<sup>fl/fl</sup>* embryos.** (A) The whole and parts of skeleton of *Erk5<sup>fl/fl</sup>* and *Prx1-Cre;Erk5<sup>fl/fl</sup>* and *Col2a1-Cre;Erk5<sup>fl/fl</sup>* embryos at E14.5, E13.5 and E12.5. Embryos were double stained with alizarin red and alcian blue. Bar=500  $\mu$ m. Representative images of skeletal preparations derived from more than 3 embryos from different litters are shown. Quantitative data of width of (B) femur, (C) tibia and (D) metatarsal of *Erk5<sup>fl/fl</sup>* and *Prx1-Cre;Erk5<sup>fl/fl</sup>* and *Col2a1-Cre;Erk5<sup>fl/fl</sup>* embryos at E12.5-18.5 (n=3). \*P<0.05, \*\*P<0.01, significantly different from the value obtained in control embryos (B-D). Statistical significance was determined using the two-tailed, unpaired Student's *t*-test (B-D). N.S., not significant.

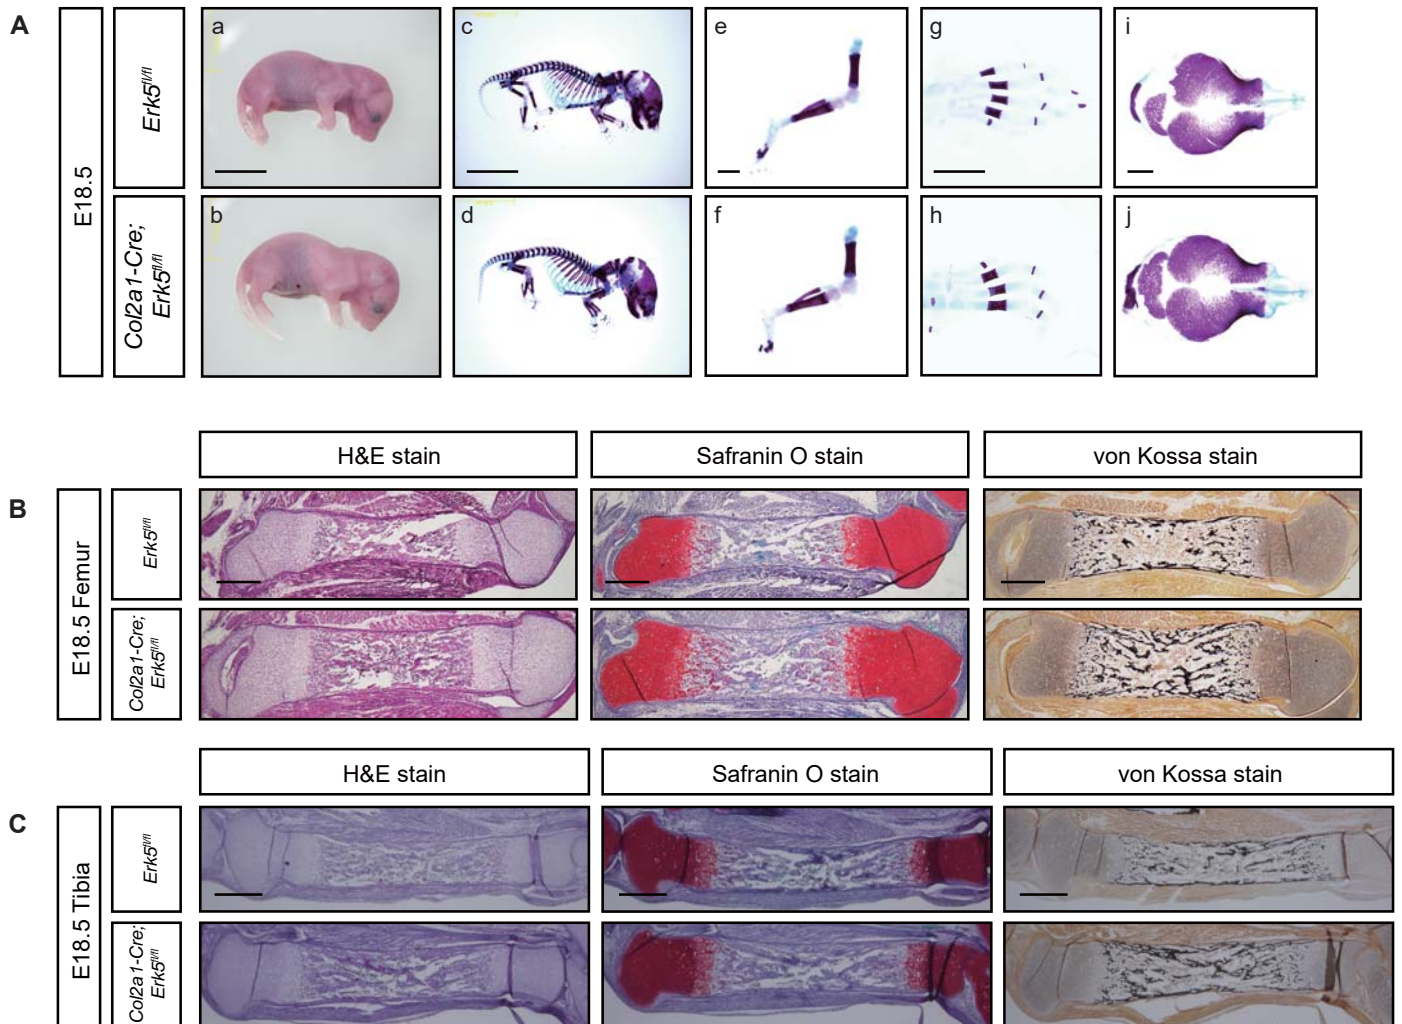

**Figure S3. Phenotypes of *Col2a1-Cre;Erk5<sup>fl/fl</sup>* embryos.** (A) The whole and parts of skeleton of *Erk5<sup>fl/fl</sup>* and *Col2a1-Cre;Erk5<sup>fl/fl</sup>* embryos at E18.5. Embryos were double stained with alizarin red and alcian blue. Bar=10 mm (a–d) and Bar=1 mm (e–j). Histological analyses of the (B) femur and (C) tibia of *Erk5<sup>fl/fl</sup>* and *Col2a1-Cre;Erk5<sup>fl/fl</sup>* embryos at E18.5. Femur and tibia were stained with H&E, Safranin O and von Kossa. Bar=500  $\mu$ m. Representative images of skeletal preparations and histological analyses derived from more than 3 embryos from different litters are shown.

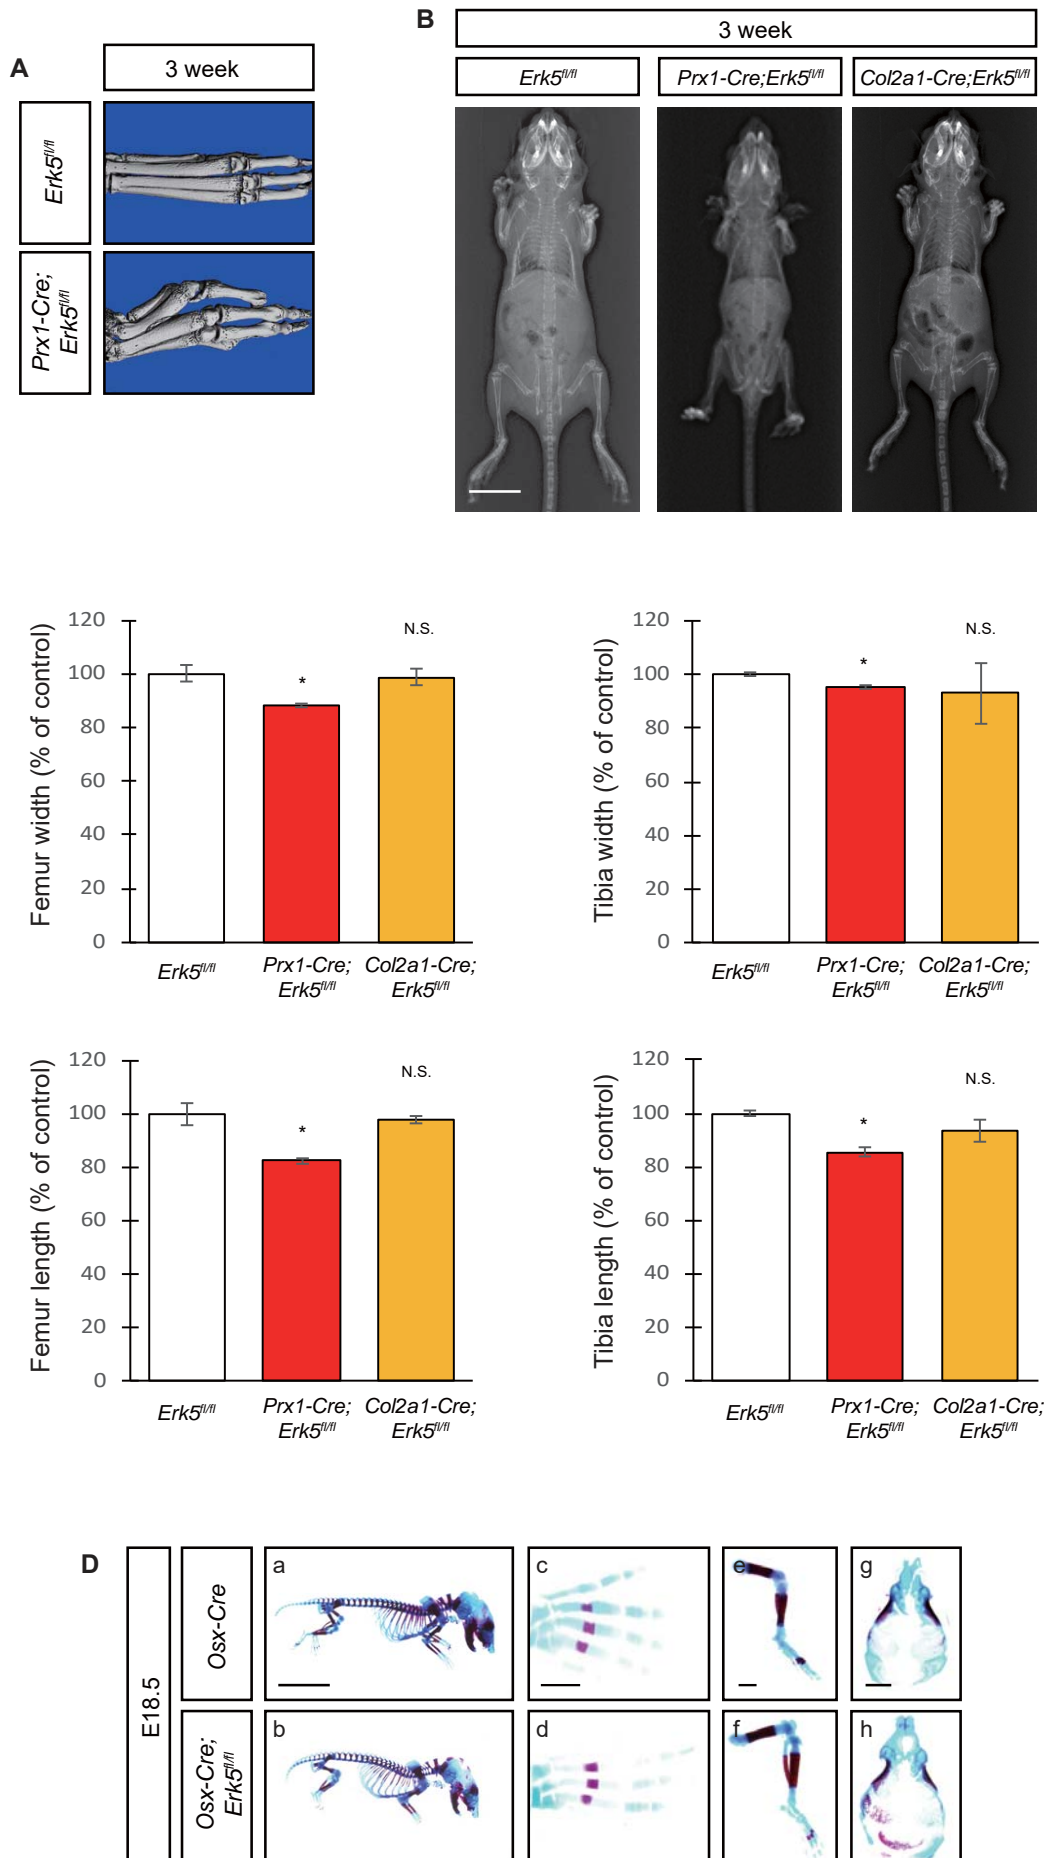

**Figure S4. Phenotypes of *Prx1-Cre;Erk5<sup>fl/fl</sup>* and *Col2a1-Cre;Erk5<sup>fl/fl</sup>* mice and *Osx-Cre;Erk5<sup>fl/fl</sup>* embryos.** (A)  $\mu$ CT 3D images of the foot of *Erk5<sup>fl/fl</sup>* and *Prx1-Cre;Erk5<sup>fl/fl</sup>* mice at 3 week-old. (B) CT images of *Erk5<sup>fl/fl</sup>*, *Prx1-Cre;Erk5<sup>fl/fl</sup>* and *Col2a1-Cre;Erk5<sup>fl/fl</sup>* mice at 3 week-old. Bar=10 mm. Representative images of  $\mu$ CT and CT derived from more than 3 mice are shown. (C) Quantitative data of width and length of femur and tibia of *Erk5<sup>fl/fl</sup>* and *Prx1-Cre;Erk5<sup>fl/fl</sup>* and *Col2a1-Cre;Erk5<sup>fl/fl</sup>* mice at 3 week-old (n=3). (D) The whole and parts of skeleton of *Osx-Cre* and *Osx-Cre;Erk5<sup>fl/fl</sup>* embryos at E18.5. Embryos were double stained with alizarin red and alcian blue. Bar=10 mm (a–b) and Bar=1 mm (c–h). Representative images of skeletal preparations derived from more than 3 embryos from different litters are shown. Statistical significance was determined using the two-tailed, unpaired Student's *t*-test (C). N.S., not significant.

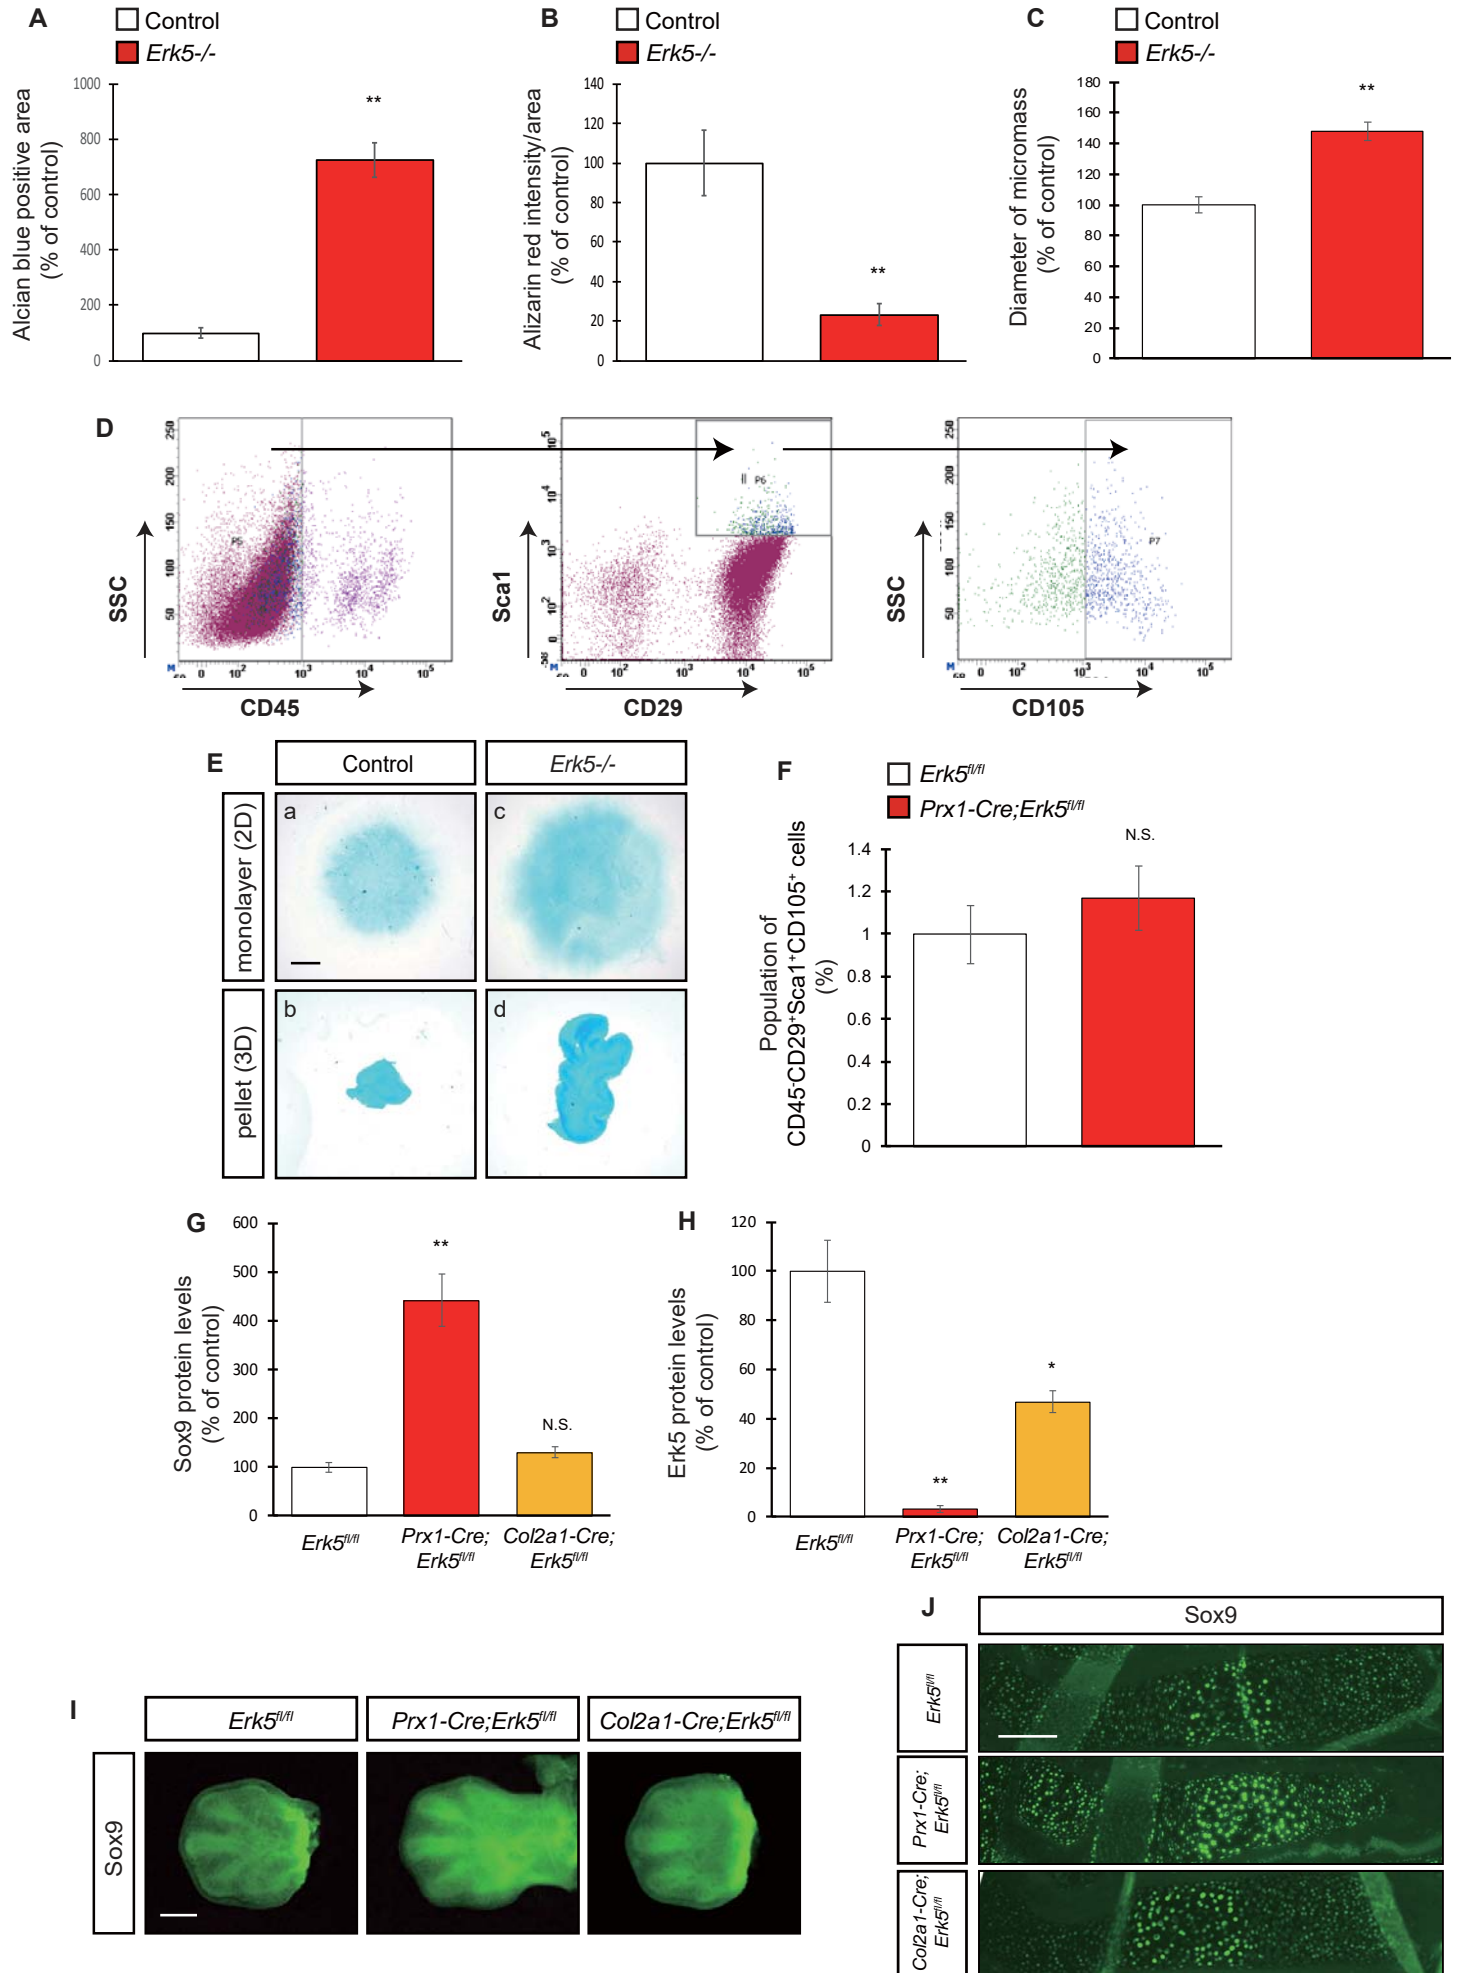

**Figure S5. Erk5 is essential for chondrogenesis through its expression in mesenchymal cells.** Quantification of (A) alcian blue stain, (B) alizarin red stain, and (C) diameter of micromass of Figure 2A. (D) Isolation strategy of CD45<sup>-</sup>CD29<sup>+</sup>Sca1<sup>+</sup>CD105<sup>+</sup> cells. (E) CD45<sup>-</sup>CD29<sup>+</sup>Sca1<sup>+</sup>CD105<sup>+</sup> cells were isolated from forelimb buds of *Erk5<sup>fl/fl</sup>* and *Prx1-Cre;Erk5<sup>fl/fl</sup>* embryos at E12.5, and subsequent 2D monolayer culture and 3D pellet culture, followed by determination of alcian blue staining (n=3). Bar=500  $\mu$ m. (F) Quantification of population of CD45<sup>-</sup>CD29<sup>+</sup>Sca1<sup>+</sup>CD105<sup>+</sup> cells in limb buds of *Erk5<sup>fl/fl</sup>* and *Prx1-Cre;Erk5<sup>fl/fl</sup>* embryos at E12.5 (n=3). (G and H) Quantification of immunoblot data of Figure 2H. Detection of Sox9 proteins in *Erk5<sup>fl/fl</sup>*, *Prx1-Cre;Erk5<sup>fl/fl</sup>* and *Col2a1-Cre;Erk5<sup>fl/fl</sup>* embryos at (I) E12.5 and (J) E16.5 by immunohistochemistry. Bar=100  $\mu$ m (I) and 500  $\mu$ m (J). Representative images of histological analyses derived from more than 3 embryos from different litters are shown. \*P<0.05, \*\*P <0.01, significantly different from the value obtained in control cells (A-C and F) or control embryos (G and H). Statistical significance was determined using the two-tailed, unpaired Student's *t*-test (A-C and F-H). N.S., not significant.



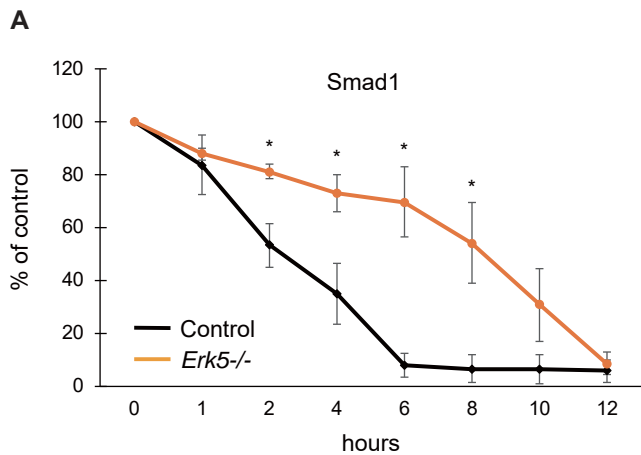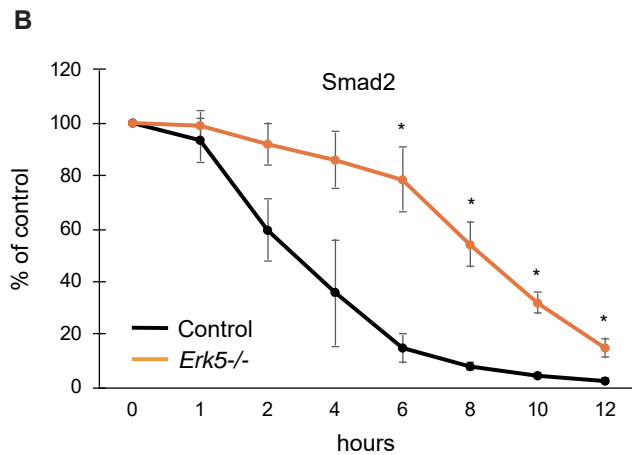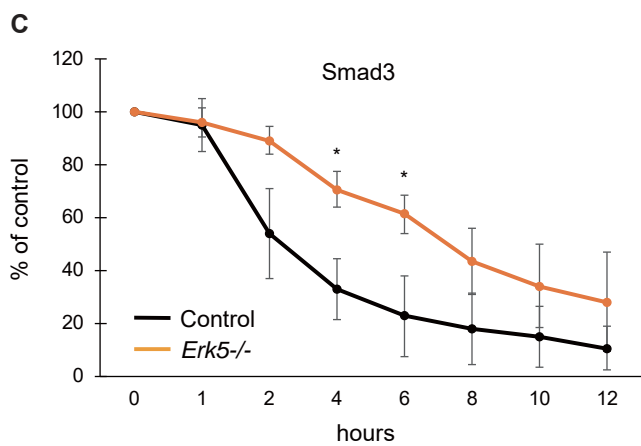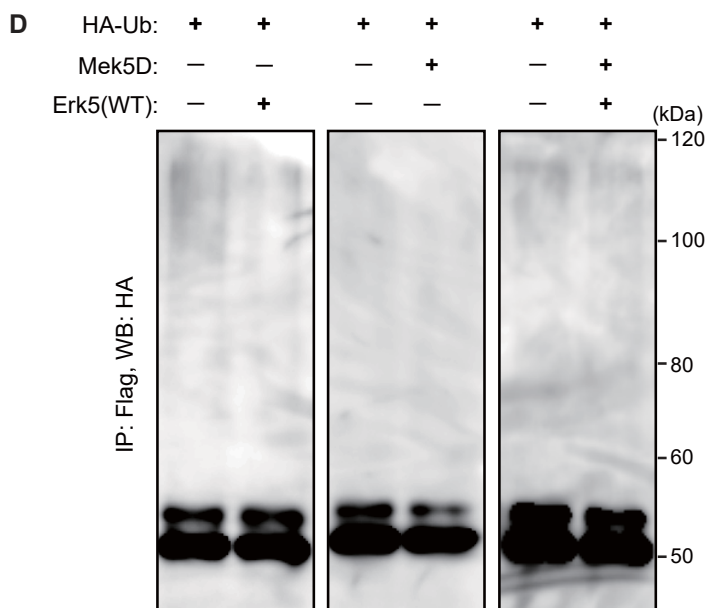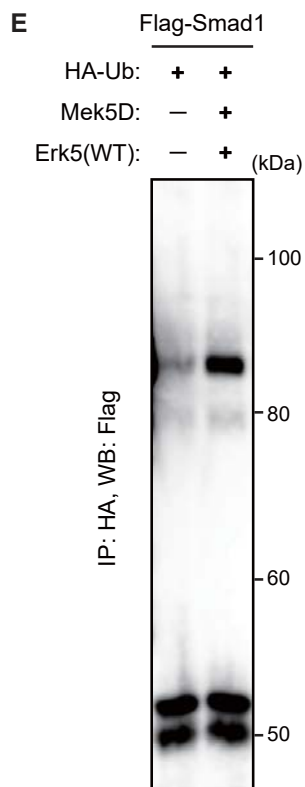

**Figure S6. Erk5 modulates stability of Smad proteins.** (A-C) Quantification of immunoblot data of Figure 2E. (D) HEK293 cells were transfected with HA-Ub in the presence of Mek5D and/or Erk5(WT) expression vectors without Flag-Smads, and subsequent IP with anti-Flag antibody, followed by immunoblotting with anti-HA antibody (n=3). (E) HEK293 cells were transfected with HA-Ub and Flag-Smads in either the presence or absence of Mek5D and Erk5(WT) expression vectors, and subsequent IP with anti-HA antibody, followed by immunoblotting with anti-Flag antibody. \* $P < 0.05$ , significantly different from the value obtained in control cells (A-C). Statistical significance was determined using the two-tailed, unpaired Student's *t*-test (A-C).

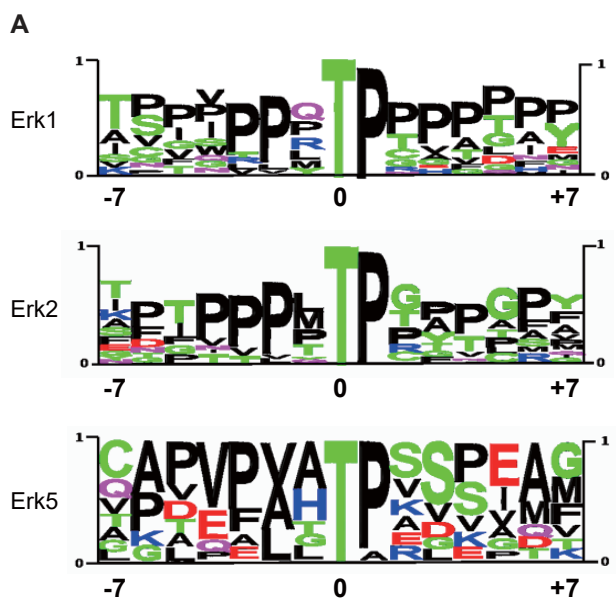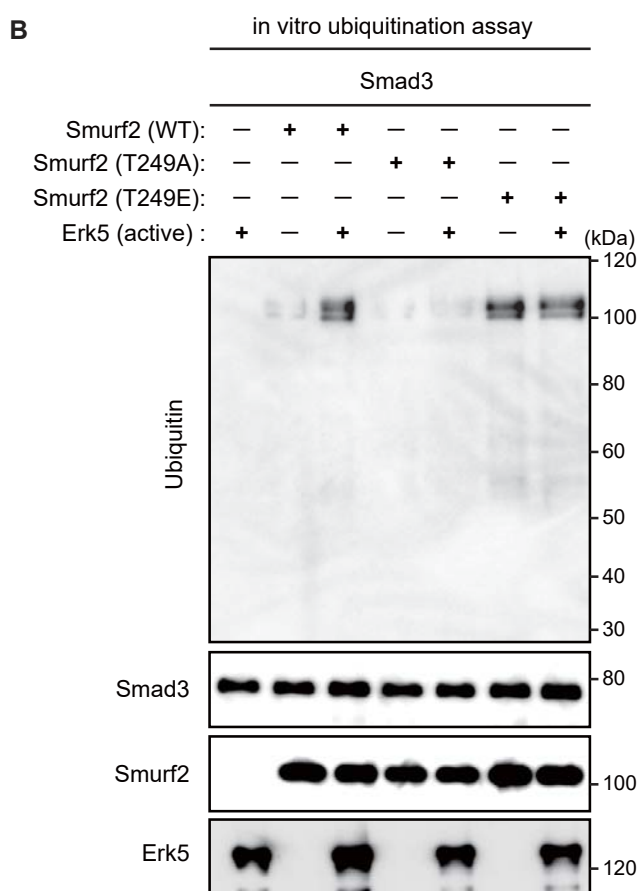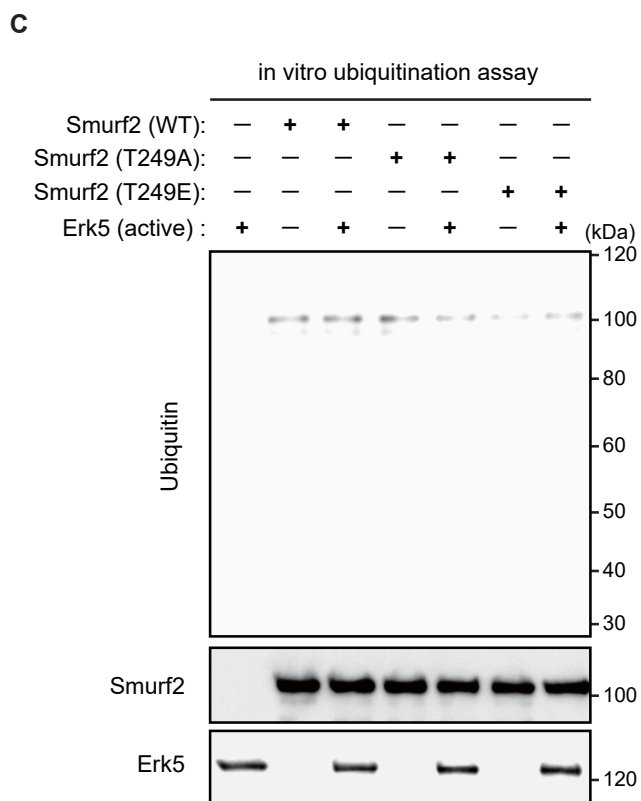

**Figure S7. Erk5 directly phosphorylates Smurf2 leading to ubiquitination of Smad proteins.** (A) Representative substrate sequence logo of Erk1, Erk2 and Erk5 generated by application from PhosphoSitePlus ([www.phosphosite.org/](http://www.phosphosite.org/)) according to morphology pattern of modification site, which is a spatial combination of specific amino acids. A modification site is defined as the modified residue at 0 position, along with seven flanking amino acids N-terminal (from position -7 to -1) and C-terminal (from position +1 to +7). (B) In vitro ubiquitination assay. Recombinant Smurf2 proteins and Smad3 protein were incubated with active Erk5 in the presence of E1 and UbcH5c, followed by SDS-PAGE (n=4). (C) In vitro ubiquitination assay. Recombinant Smurf2 proteins were incubated with active Erk5 without Smad proteins in the presence of E1 and UbcH5c, followed by SDS-PAGE (n=3).

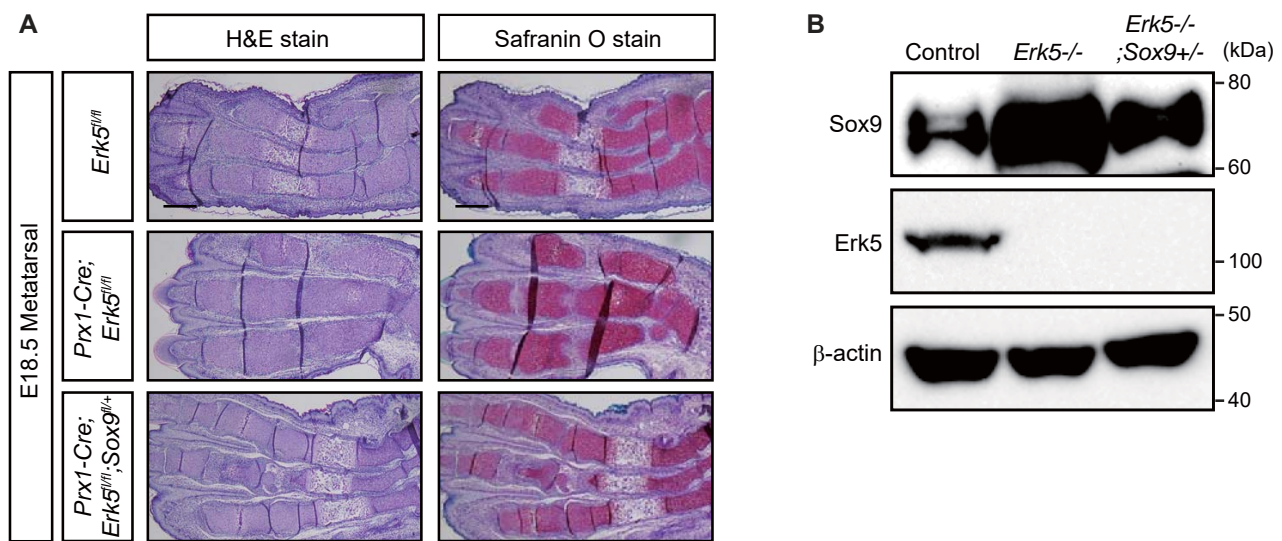

**Figure S8. Phenotypes of *Prx1-Cre;Erk5<sup>fl/fl</sup>* and *Col2a1-Cre;Erk5<sup>fl/fl</sup>* embryos and Sox9 protein level in mesenchymal cells.** (A) Histological analyses of the metatarsal of *Erk5<sup>fl/fl</sup>*, *Prx1-Cre;Erk5<sup>fl/fl</sup>*, and *Prx1-Cre;Erk5<sup>fl/fl</sup>;Sox9<sup>fl/+</sup>* embryos at E18.5. Metatarsal was stained with H&E and Safranin O. Bar=500  $\mu$ m. Representative images of histological analyses derived from more than 3 embryos from different litters are shown. (B) Primary mesenchymal cells of *Erk5<sup>fl/fl</sup>*, *Prx1-Cre;Erk5<sup>fl/fl</sup>*, and *Prx1-Cre;Erk5<sup>fl/fl</sup>;Sox9<sup>fl/+</sup>* embryos at E12.5 were isolated, followed by determination of Sox9 protein level (n=3).

**Table S1. List of primers used for generating Smurf2 mutant constructs.**

| Genes                   | F (5'-3')                       | R (5'-3')                        |
|-------------------------|---------------------------------|----------------------------------|
| <b>Smurf2<br/>T249A</b> | TTACATGCTCCTCCAGACCTAC<br>CAGAA | TGGAGGAGCATGTAAATGTGT<br>TCTGCT  |
| <b>Smurf2<br/>T249E</b> | TTACATGAACCTCCAGACCTA<br>CCAGAA | TGGAGGTTTCATGTAAATGTGTT<br>CTGCT |

**Table S2. List of primers used for real-time PCR.**

| Genes          | Upstream (5'-3')              | Downstream (5'-3')           |
|----------------|-------------------------------|------------------------------|
| <i>Acan</i>    | GAGGAGCTCCAGCACAAATATCG<br>A  | GGTAGATCTGCAGGGTTCGAT        |
| <i>Col2a1</i>  | TGGTGGAGCAGCAAGAGCAA          | CAGTGGACAGTAGACGGAGGA<br>AA  |
| <i>Col10a1</i> | TGCCCGTGTCTGCTTTTACTGTC<br>A  | TCAAATGGGATGGGGGCACCTA<br>CT |
| <i>Mmp13</i>   | AGGCCTTCAGAAAAGCCTTC          | TCCTTGGAGTGATCCAGACC         |
| <i>Runx2</i>   | CCTAGTTAGAGTGGTAGCAGAA<br>GC  | ACAGACAACGAAGAAAGTTCC<br>CAC |
| <i>Smad1</i>   | GCTGCCTTAAACAGACAAGCTG<br>G   | CCGTGGAGCGGATAAGACAGA<br>AG  |
| <i>Smad2</i>   | TGCAACAGTGTGTAAGATCCCA<br>CC  | GGTTGACAGACTGAGCCAGAA<br>G   |
| <i>Smad3</i>   | CACGCAGAACGTGAACACC           | GGCAGTAGATAACGTGAGGGA        |
| <i>Smad4</i>   | ACACCAACAAGTAACGATGCC         | GCAAAGGTTTCACTTTCCCA         |
| <i>Smad5</i>   | ATGAGCTTTGTCAAGGGCTGG         | GGAGAGCCCATCTGAGTAAGG<br>AC  |
| <i>Smad6</i>   | ATCACCTCCTGCCCCTGT            | CTGGGGTGGTGTCTCTGG           |
| <i>Smad7</i>   | AAGATCGGCTGTGGCATC            | CCAACAGCGTCCTGGAGT           |
| <i>Smad8</i>   | ACCAGGACACAACTCAAAC<br>C      | GTCCTTGATGGACGTGGCTG         |
| <i>Sox9</i>    | TTTGGGTCTGCCTGGACTGTAT<br>GTG | AAGGTCTGTCCGATGTCTCTCT<br>GC |

**Table S3. List of primers used for ChIP assay.**

| <b>Fragments</b>                          | <b>Upstream (5'-3')</b>      | <b>Downstream (5'-3')</b>      |
|-------------------------------------------|------------------------------|--------------------------------|
| <b><i>Sox9 promoter</i><br/>BRE (a-b)</b> | CCAGCTCCGCTTTGACGAG<br>C     | CACTTTTCGATGCTGTCTCCG<br>TGG   |
| <b><i>Sox9 promoter</i><br/>SBE (c-d)</b> | ACCACGGAGACAGCATCGA<br>AAAGT | TTCACACGGAGACCGTTCCA<br>AAACTG |

**Table S4. List of primers used for generating Smad1 mutant constructs.**

| <b>Genes</b>           | <b>F (5'-3')</b>                | <b>R (5'-3')</b>                |
|------------------------|---------------------------------|---------------------------------|
| <b>Smad1<br/>S11A</b>  | TTTACAGCTCCAGCTGTGAAG<br>AGACTT | AGCTGGAGCTGTAAAGGAAAA<br>TAAACT |
| <b>Smad1<br/>S132A</b> | GTAGAAGCTCCTGTACTTCCT<br>CCTGTG | TACAGGAGCTTCTACTCTCTTA<br>TAGTG |
| <b>Smad1<br/>S187A</b> | CCTCACGCTCCCAATAGCAGT<br>TACCCA | ATTGGGAGCGTGAGGAAACG<br>GGTGGCT |
| <b>Smad1<br/>S195A</b> | CCAAACGCTCCTGGGAGCAGC<br>AGCAGC | CCCAGGAGCGTTTGGGTAAC<br>GCTATT  |
| <b>Smad1<br/>S206A</b> | CCTCACGCTCCCACCAGCTCA<br>GACCCA | GGTGGGAGCGTGAGGGTAGG<br>TGCTGCT |
| <b>Smad1<br/>S214A</b> | CCAGGAGCTCCTTTCCAGATG<br>CCAGCT | ACCAGCTCAGACCCAGGAGCT<br>CCTTTC |
| <b>Smad1<br/>S456A</b> | ATGGGTGCTCCTCATAATCCTA<br>TTTCA | ATGAGGAGCACCCATTTGAGT<br>AAGAAC |
